# Supplementary material for: Deciphering the Pharmacological Mechanisms of Taohe-Chengqi Decoction Extract Against Renal Fibrosis Through Integrating Network Pharmacology and Experimental Validation In Vitro and In Vivo
Source: PubMed Central journal article supplement (PMC7176980; doi:10.3389/fphar.2020.00425), 2020-04-16
Supplement: Image_1.pdf [file Image_1.pdf]

### Positive

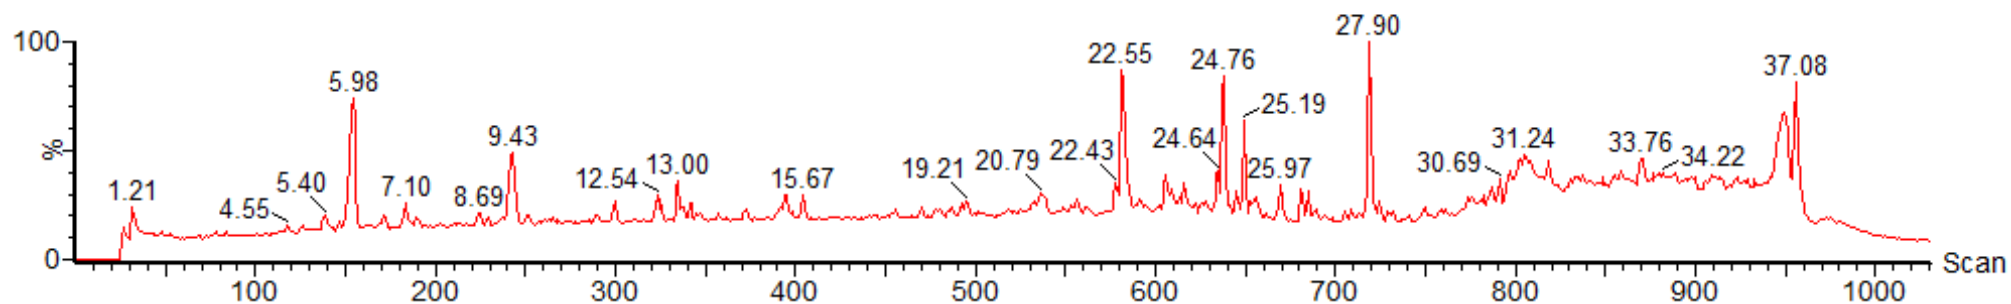

### Negative

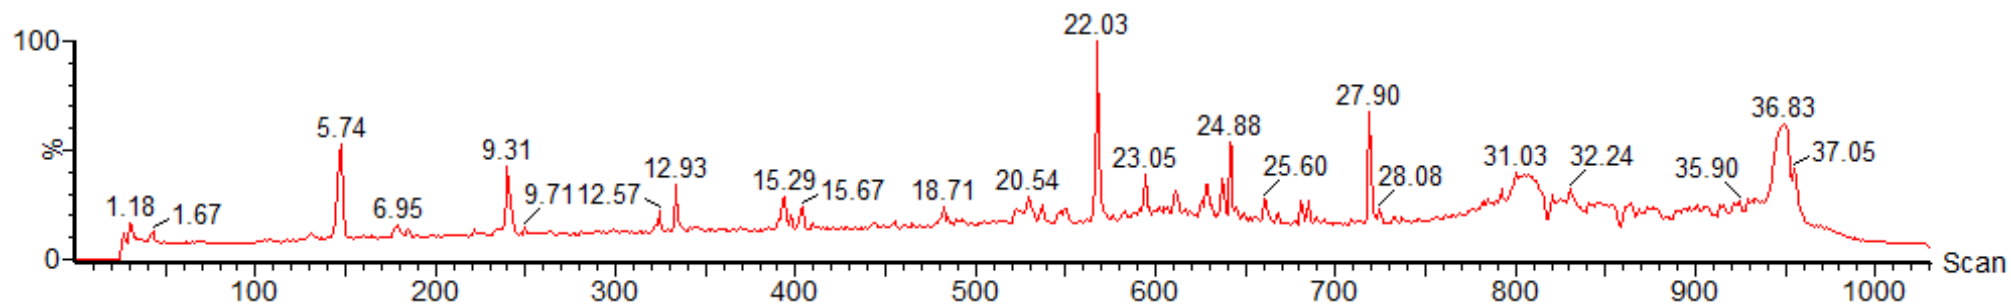

Supplementary Figure 1
